# Supplementary material
Source: PubMed Central journal article supplement (PMC10970714)
Supplement: NIHMS1970361-supplement-1.pdf [file NIHMS1970361-supplement-1.pdf]

Supplemental Table 1. Overall Prevalence, Average Life Impact Scores, Population Impact Scores (n=124)

|                                             | Prevalence (%) | Average Life<br>Impact | Population<br>Impact |
|---------------------------------------------|----------------|------------------------|----------------------|
| Problems with urinary or bowel control      | 39             | 2.37                   | 0.92                 |
| Gastrointestinal issues                     | 75             | 1.90                   | 1.43                 |
| Communication issues                        | 70             | 1.87                   | 1.32                 |
| Impaired sleep or daytime Sleepiness        | 69             | 1.81                   | 1.25                 |
| Fatigue                                     | 74             | 1.80                   | 1.34                 |
| Limitations with mobility and<br>ambulation | 64             | 1.69                   | 1.07                 |
| Myotonia                                    | 59             | 1.69                   | 1.00                 |
| Inability to do activities                  | 68             | 1.68                   | 1.14                 |
| Difficulty thinking                         | 62             | 1.66                   | 1.02                 |
| Hip, thigh, or knee weakness                | 52             | 1.62                   | 0.84                 |
| Problems with hands or fingers              | 79             | 1.56                   | 1.24                 |
| Problems with vision, hearing, or smell     | 57             | 1.49                   | 0.85                 |
| Problems with shoulders or arms             | 52             | 1.40                   | 0.72                 |
| Problems with choking or swallowing         | 41             | 1.39                   | 0.58                 |
| Emotional Issues                            | 64             | 1.36                   | 0.86                 |
| Decreased social situation satisfaction     | 44             | 1.31                   | 0.58                 |
| Changed body image                          | 53             | 1.28                   | 0.69                 |
| Pain                                        | 64             | 1.25                   | 0.79                 |

|                                        | Prevalence (%) | Average Life<br>Impact | Population<br>Impact |
|----------------------------------------|----------------|------------------------|----------------------|
| Decreased social situation performance | 45             | 1.19                   | 0.53                 |
| Back, chest, or abdomen weakness       | 51             | 1.15                   | 0.59                 |

Supplemental Table 2. Prevalence by Age Groups

|                                             | Prevalence (%) |              |               |               |             | <i>p</i><br>value |
|---------------------------------------------|----------------|--------------|---------------|---------------|-------------|-------------------|
|                                             | 5-7<br>n=11    | 8-11<br>n=12 | 12-17<br>n=33 | 18-28<br>n=39 | 28+<br>n=29 |                   |
| Limitations with mobility and<br>ambulation | 73             | 50           | 60            | 55            | 79          | 0.003             |
| Hip, thigh, or knee weakness                | 45             | 50           | 50            | 47            | 64          | 0.249             |
| Back, chest, or abdomen weakness            | 18             | 33           | 53            | 61            | 61          | 0.517             |
| Problems with hands or fingers              | 55             | 67           | 62            | 95            | 89          | 0.178             |
| Problems with shoulders or arms             | 18             | 58           | 47            | 51            | 71          | 0.465             |
| Inability to do activities                  | 64             | 55           | 62            | 79            | 79          | 0.702             |
| Myotonia                                    | 18             | 33           | 41            | 79            | 79          | 0.312             |
| Gastrointestinal issues                     | 64             | 83           | 77            | 73            | 71          | 0.050             |
| Problems with urinary or bowel<br>control   | 64             | 58           | 40            | 28            | 30          | 0.181             |
| Problems with choking or<br>swallowing      | 18             | 58           | 53            | 68            | 63          | 0.374             |
| Emotional Issues                            | 36             | 83           | 77            | 56            | 63          | 0.114             |

|                                            | 5-7<br>n=11 | 8-11<br>n=12 | 12-17<br>n=33 | 18-28<br>n=39 | 28+<br>n=29 | <i>p</i><br>value |
|--------------------------------------------|-------------|--------------|---------------|---------------|-------------|-------------------|
| Changed body image                         | 27          | 67           | 59            | 49            | 57          | 0.220             |
| Difficulty thinking                        | 64          | 83           | 79            | 53            | 43          | 0.136             |
| Decreased social situation<br>satisfaction | 18          | 55           | 21            | 60            | 50          | 0.101             |
| Decreased social situation<br>performance  | 18          | 33           | 31            | 57            | 56          | 0.087             |
| Impaired sleep or daytime sleepiness       | 9           | 58           | 69            | 86            | 74          | 0.168             |
| Fatigue                                    | 64          | 75           | 64            | 89            | 79          | 0.077             |
| Pain                                       | 27          | 58           | 77            | 63            | 64          | 0.215             |
| Problems with vision, hearing, or<br>smell | 18          | 42           | 31            | 53            | 50          | 0.464             |
| Communication issues                       | 82          | 67           | 86            | 61            | 61          | 0.044             |

Supplemental Table 3. Prevalence by CTG Repeat Length

|                                             | Prevalence (%) |                  |                      |              | <i>p</i> value |
|---------------------------------------------|----------------|------------------|----------------------|--------------|----------------|
|                                             | 0-500<br>n=19  | 501-1000<br>n=38 | 1001-<br>1500<br>n=8 | 1501+<br>n=6 |                |
| Limitations with mobility and<br>ambulation | 47             | 71               | 50                   | 100          | 0.120          |
| Hip, thigh, or knee weakness                | 26             | 53               | 50                   | 100          | 0.085          |
| Back, chest, or abdomen weakness            | 21             | 58               | 38                   | 67           | 0.751          |
| Problems with hands or fingers              | 53             | 84               | 75                   | 83           | 0.049          |
| Problems with shoulders or arms             | 37             | 47               | 38                   | 67           | 0.396          |
| Inability to do activities                  | 53             | 63               | 100                  | 100          | 0.061          |
| Myotonia                                    | 47             | 70               | 43                   | 33           | 0.655          |
| Gastrointestinal issues                     | 68             | 76               | 75                   | 100          | 0.070          |
| Problems with urinary or bowel control      | 21             | 39               | 63                   | 100          | 0.065          |
| Problems with choking or swallowing         | 53             | 53               | 25                   | 67           | 0.200          |
| Emotional Issues                            | 56             | 68               | 50                   | 67           | 0.371          |
| Changed body image                          | 68             | 55               | 50                   | 50           | 0.920          |
| Difficulty thinking                         | 58             | 68               | 100                  | 83           | 0.634          |
| Decreased social situation satisfaction     | 50             | 37               | 38                   | 60           | 0.614          |
| Decreased social situation performance      | 58             | 39               | 38                   | 50           | 0.494          |
| Impaired sleep or daytime sleepiness        | 68             | 68               | 38                   | 50           | 0.187          |

|                                         | 0-500<br>n=19 | 501-1000<br>n=38 | 1001-<br>1500<br>n=8 | 1501+<br>n=6 | <i>p</i> value |
|-----------------------------------------|---------------|------------------|----------------------|--------------|----------------|
| Fatigue                                 | 78            | 82               | 75                   | 67           | 0.909          |
| Pain                                    | 53            | 63               | 63                   | 83           | 0.574          |
| Problems with vision, hearing, or smell | 47            | 39               | 38                   | 83           | 0.165          |
| Communication issues                    | 74            | 73               | 100                  | 100          | 0.004          |

Supplemental Table 4. Prevalence by CTG Repeat Length

|                                          | Prevalence (%) |                  |                      |              | <i>p</i> value |
|------------------------------------------|----------------|------------------|----------------------|--------------|----------------|
|                                          | 0-500<br>n=19  | 501-1000<br>n=38 | 1001-<br>1500<br>n=8 | 1501+<br>n=6 |                |
| Limitations with mobility and ambulation | 47             | 71               | 50                   | 100          | 0.120          |
| Hip, thigh, or knee weakness             | 26             | 53               | 50                   | 100          | 0.085          |
| Back, chest, or abdomen weakness         | 21             | 58               | 38                   | 67           | 0.751          |
| Problems with hands or fingers           | 53             | 84               | 75                   | 83           | 0.049          |
| Problems with shoulders or arms          | 37             | 47               | 38                   | 67           | 0.396          |
| Inability to do activities               | 53             | 63               | 100                  | 100          | 0.061          |
| Myotonia                                 | 47             | 70               | 43                   | 33           | 0.655          |
| Gastrointestinal issues                  | 68             | 76               | 75                   | 100          | 0.070          |
| Problems with urinary or bowel control   | 21             | 39               | 63                   | 100          | 0.065          |
| Problems with choking or swallowing      | 53             | 53               | 25                   | 67           | 0.200          |
| Emotional Issues                         | 56             | 68               | 50                   | 67           | 0.371          |
| Changed body image                       | 68             | 55               | 50                   | 50           | 0.920          |
| Difficulty thinking                      | 58             | 68               | 100                  | 83           | 0.634          |
| Decreased social situation satisfaction  | 50             | 37               | 38                   | 60           | 0.614          |
| Decreased social situation performance   | 58             | 39               | 38                   | 50           | 0.494          |
| Impaired sleep or daytime sleepiness     | 68             | 68               | 38                   | 50           | 0.187          |

|                                         | 0-500<br>n=19 | 501-1000<br>n=38 | 1001-<br>1500<br>n=8 | 1501+<br>n=6 | <i>p</i> value |
|-----------------------------------------|---------------|------------------|----------------------|--------------|----------------|
| Fatigue                                 | 78            | 82               | 75                   | 67           | 0.909          |
| Pain                                    | 53            | 63               | 63                   | 83           | 0.574          |
| Problems with vision, hearing, or smell | 47            | 39               | 38                   | 83           | 0.165          |
| Communication issues                    | 74            | 73               | 100                  | 100          | 0.004          |

Supplemental Table 5. Average Life Impact by CTG Repeat Length

|                                          | Average Life Impact |                      |                      |              | <i>p</i> -value |
|------------------------------------------|---------------------|----------------------|----------------------|--------------|-----------------|
|                                          | 0-500<br>n=19       | 501-<br>1000<br>n=38 | 1000-<br>1500<br>n=8 | 1501+<br>n=6 |                 |
| Limitations with mobility and ambulation | 0.74                | 0.90                 | 1.13                 | 2.83         | 0.062           |
| Hip, thigh, or knee weakness             | 0.37                | 0.84                 | 0.88                 | 2.00         | 0.055           |
| Back, chest, or abdomen weakness         | 0.21                | 0.58                 | 0.25                 | 0.67         | 0.251           |
| Problems with hands or fingers           | 0.79                | 1.40                 | 1.00                 | 1.33         | 0.043           |
| Problems with shoulders or arms          | 0.37                | 0.71                 | 0.00                 | 1.50         | 0.184           |
| Inability to do activities               | 0.68                | 1.08                 | 1.75                 | 2.80         | 0.029           |
| Myotonia                                 | 0.47                | 1.27                 | 0.29                 | 0.83         | 0.322           |
| Gastrointestinal issues                  | 1.16                | 1.53                 | 1.37                 | 2.33         | 0.090           |
| Problems with urinary or bowel control   | 0.37                | 0.92                 | 1.88                 | 3.00         | 0.025           |
| Problems with choking or swallowing      | 0.53                | 1.08                 | 0.00                 | 1.33         | 0.060           |

|                                         |       |          |           |       |                 |
|-----------------------------------------|-------|----------|-----------|-------|-----------------|
| Emotional Issues                        | 0.89  | 0.89     | 0.75      | 1.67  | 0.682           |
| Changed body image                      | 0.37  | 0.71     | 1.13      | 1.17  | 0.505           |
| Difficulty thinking                     | 0.90  | 1.03     | 1.75      | 2.67  | 0.450           |
| Decreased social situation satisfaction | 1.00  | 0.45     | 0.12      | 0.80  | 0.864           |
| Decreased social situation performance  | 0.84  | 0.37     | 0.12      | 1.00  | 0.971           |
| Impaired sleep or daytime Sleepiness    | 1.16  | 1.37     | 0.75      | 0.67  | 0.050           |
| Fatigue                                 | 1.28  | 1.53     | 1.63      | 1.50  | 0.776           |
|                                         | 0-500 | 501-1000 | 1000-1500 | 1501+ | <i>p</i> -value |
|                                         | n=19  | n=38     | n=8       | n=6   |                 |
| Pain                                    | 0.63  | 0.92     | 0.50      | 1.33  | 0.257           |
| Problems with vision, hearing, or smell | 0.58  | 0.39     | 1.13      | 1.33  | 0.137           |
| Communication issues                    | 0.89  | 1.68     | 2.00      | 2.83  | 0.006           |



Supplemental Table 6. Prevalence by Age of Disease Onset

|                                          | Prevalence (%)      |                     | <i>p</i> value |
|------------------------------------------|---------------------|---------------------|----------------|
|                                          | <1 year age<br>n=54 | >1 year age<br>n=67 |                |
| Limitations with mobility and ambulation | 69                  | 62                  | 0.568          |
| Hip, thigh, or knee weakness             | 60                  | 48                  | 0.274          |
| Back, chest, or abdomen weakness         | 54                  | 51                  | 0.856          |
| Problems with hands or fingers           | 80                  | 82                  | 1.00           |
| Problems with shoulders or arms          | 51                  | 54                  | 0.855          |
| Inability to do activities               | 69                  | 65                  | 0.699          |
| Myotonia                                 | 43                  | 74                  | 0.001          |
| Gastrointestinal issues                  | 81                  | 70                  | 0.207          |
| Problems with urinary or bowel control   | 44                  | 30                  | 0.181          |
| Problems with choking or swallowing      | 54                  | 60                  | 0.581          |
| Emotional Issues                         | 68                  | 60                  | 0.445          |
| Changed body image                       | 45                  | 58                  | 0.201          |
| Difficulty thinking                      | 71                  | 51                  | 0.026          |
| Decreased social situation satisfaction  | 35                  | 49                  | 0.191          |
| Decreased social situation performance   | 36                  | 50                  | 0.141          |
| Impaired sleep or daytime sleepiness     | 62                  | 75                  | 0.167          |
|                                          | <1 year age         | >1 year age         | <i>p</i> value |

|                                         | n=54 | n=67 |       |
|-----------------------------------------|------|------|-------|
| Fatigue                                 | 77   | 75   | 0.832 |
| Pain                                    | 63   | 65   | 1.00  |
| Problems with vision, hearing, or smell | 38   | 43   | 0.709 |
| Communication issues                    | 77   | 61   | 0.077 |

Supplemental Table 7. Average Life Impact by Age of Disease Onset

|                                             | Average Life Impact |                     | <i>p</i> value |
|---------------------------------------------|---------------------|---------------------|----------------|
|                                             | <1 year age<br>n=54 | >1 year age<br>n=69 |                |
| Limitations with mobility and<br>ambulation | 1.97                | 1.33                | 0.053          |
| Hip, thigh, or knee weakness                | 1.69                | 1.48                | 0.771          |
| Back, chest, or abdomen weakness            | 1.41                | 0.94                | 0.095          |
| Problems with hands or fingers              | 1.58                | 1.50                | 0.825          |
| Problems with shoulders or arms             | 1.30                | 1.49                | 0.550          |
| Inability to do activities                  | 2.05                | 1.38                | 0.053          |
| Myotonia                                    | 1.54                | 1.69                | 0.451          |
| Gastrointestinal issues                     | 1.76                | 1.83                | 0.804          |

Patient-reported impact on pediatric-onset DM1 11

|                                         |      |      |       |
|-----------------------------------------|------|------|-------|
| Problems with urinary or bowel control  | 2.91 | 1.81 | 0.016 |
| Problems with choking or swallowing     | 1.60 | 1.34 | 0.618 |
| Emotional Issues                        | 1.47 | 1.23 | 0.376 |
| Changed body image                      | 1.70 | 1.03 | 0.035 |
| Difficulty thinking                     | 1.92 | 1.40 | 0.101 |
| Decreased social situation satisfaction | 1.50 | 1.21 | 0.689 |
| Decreased social situation performance  | 1.32 | 1.12 | 0.634 |
| Impaired sleep or daytime sleepiness    | 1.72 | 1.86 | 0.644 |

|                                         | <1 year age<br>n=54 | >1 year age<br>n=67 | <i>p</i> value |
|-----------------------------------------|---------------------|---------------------|----------------|
| Fatigue                                 | 1.80                | 1.92                | 0.590          |
| Pain                                    | 1.18                | 1.32                | 0.359          |
| Problems with vision, hearing, or smell | 1.60                | 1.27                | 0.297          |
| Communication issues                    | 2.32                | 1.38                | 0.001          |
